# Supplementary material for: Regulation of Anticancer Styrylpyrone Biosynthesis in the Medicinal Mushroom Inonotus obliquus Requires Thioredoxin Mediated Transnitrosylation of S-nitrosoglutathione Reductase
Source: PubMed Central journal article supplement (PMC5116637; doi:10.1038/srep37601), 2016-11-21
Supplement: srep37601-s1.pdf [file srep37601-s1.pdf]

# Regulation of Anticancer Styrylpyrone Biosynthesis in the Medicinal Mushroom *Inonotus obliquus* Requires Thioredoxin Mediated Transnitrosylation of S-nitrosogluthathione Reductase

## Supplementary Information

Yanxia Zhao<sup>1</sup>, Meihong He<sup>1</sup>, Jianing Ding<sup>1</sup>, Qi Xi<sup>1</sup>, Gary J Loake<sup>2,3</sup>, Weifa Zheng<sup>1\*</sup>

<sup>1</sup>Laboratory for Biotechnology of Medicinal Plants, School of Life Sciences, Jiangsu Normal University, Xuzhou 221116, China

<sup>2</sup>Institute of Molecular Plant Sciences, School of Biological Sciences, University of Edinburgh, Edinburgh EH9 3BF, UK

<sup>3</sup>Jiangsu Normal University – Edinburgh University, Centre for Biotechnology of Medicinal and Food Plants, Jiangsu Normal University, Xuzhou 221116, China

### \* **Address for correspondence:**

Weifa Zheng Ph. D & Professor

Laboratory for Biotechnology of Medicinal Plants, School of Life Sciences, Jiangsu Normal University, Xuzhou 221116, China

Tel:86-516-83403179

Email: [yyzw@jsnu.edu.cn](mailto:yyzw@jsnu.edu.cn)

Figure S1

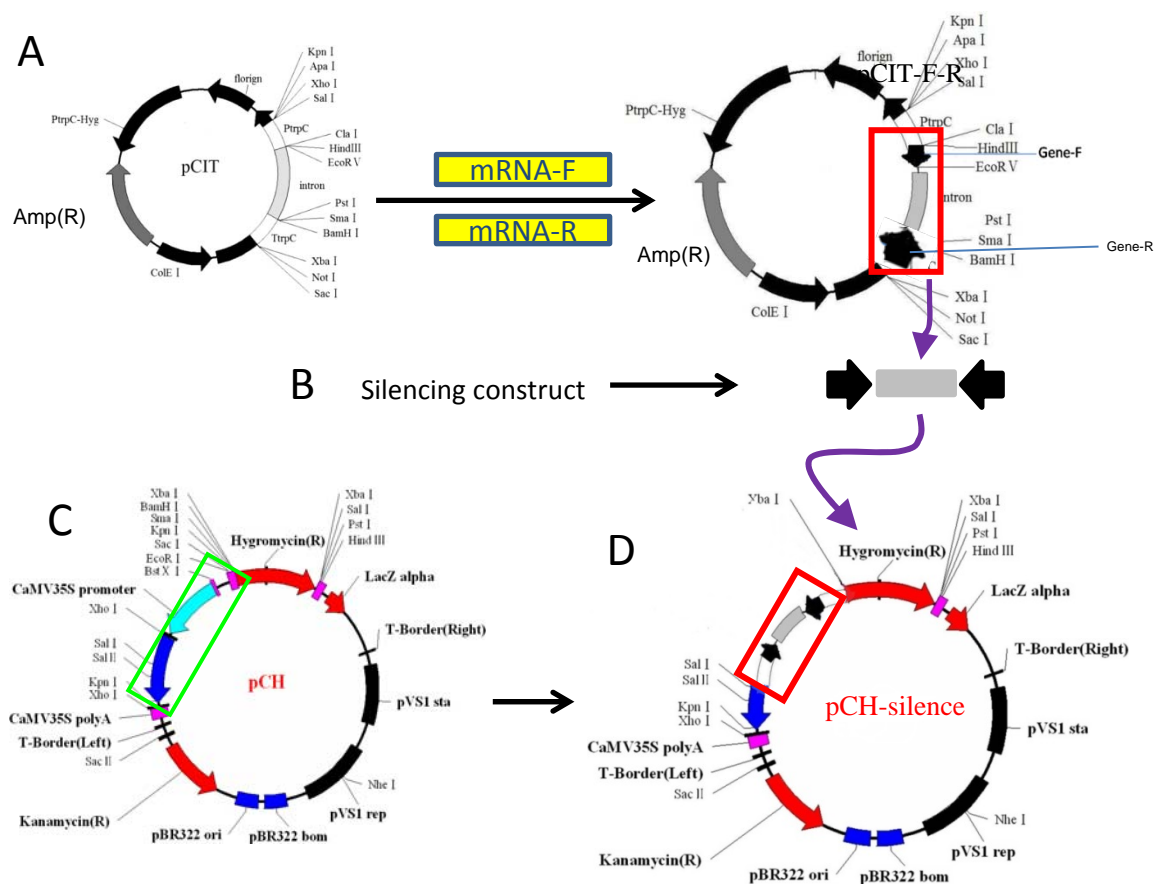

Fig. S1 Strategies of gene knockdown by RNA interference. **(A)** vector pCIT containing an intron flanked by MCS; **(B)** The mRNA fragment of target gene was fused with the two ends of intron complementarily to form silencing construct. **(C)** The vector pCH containing hygromycin resistant gene were linearized by Xho I and Sac I. **(D)** The silencing construct was inserted to vector pCH to construct pCH-GSNOR or pCG-IoTrx1,2,3 knockdown plasmid.

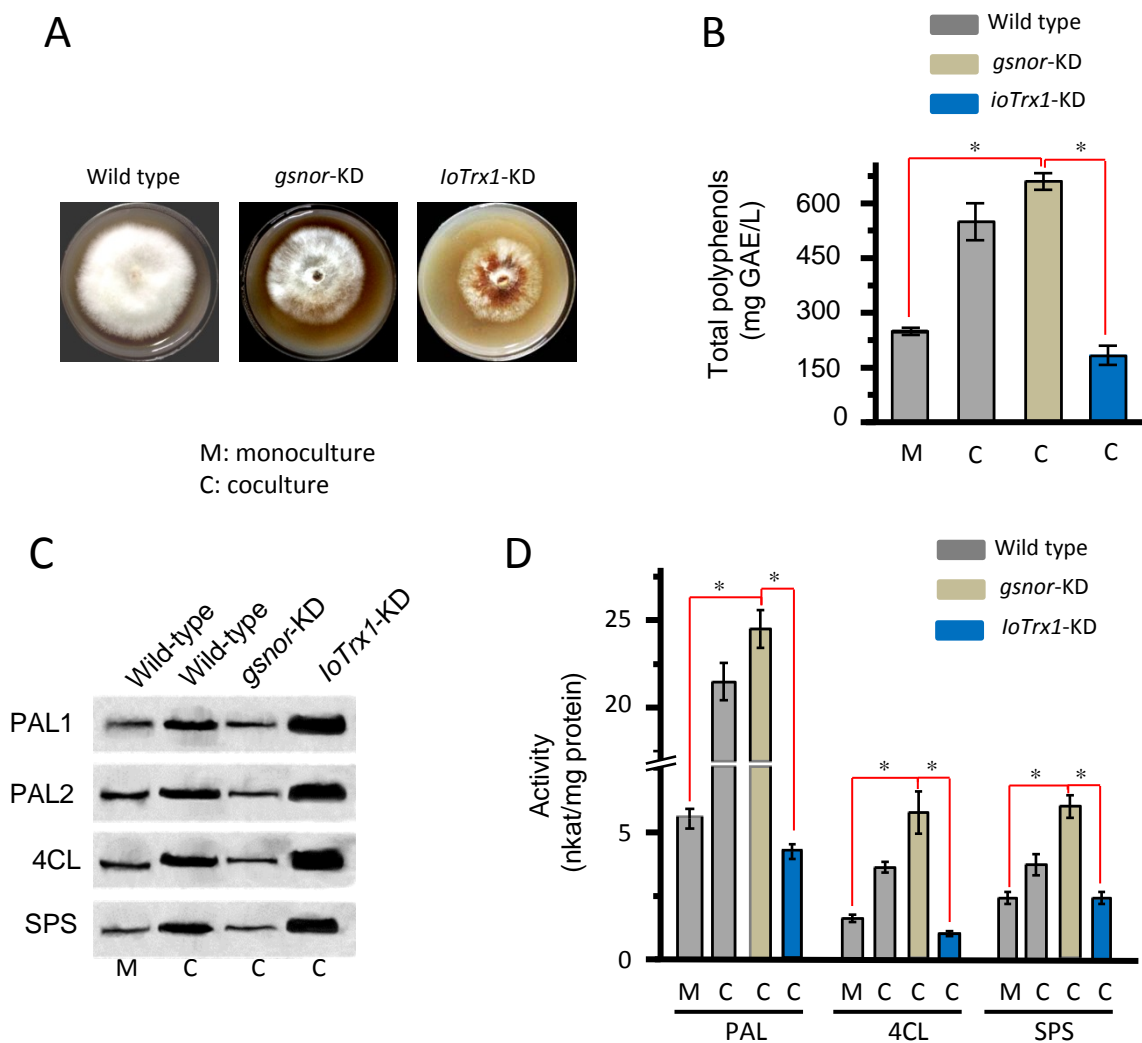

**Fig. S2** Knockdown of the genes encoding GSNOR and *IoTrx1* affects S-nitrosylation of the enzymes integral to styrylpyrone biosynthesis, their subsequent catalytic activities and accumulation of styrylpyrone polyphenols. **(A)** Phenotype of *gsnor*- and *IoTrx1*-knockdown strain (*gsnor*-KD, *IoTrx1*-KD). **(B)** Accumulation of polyphenols by *I. obliquus* wild-type or knockdown mutants cocultured with *P. morii*; **(C)** S-nitrosylation of phenylalanine ammonia lyase (PAL), 4-coumarate CoA ligase (4CL) and styrylpyrone synthase (SPS) in wild-type or knockdown mutants cocultured with *P. morii*. **(D)** Catalytic activity of PAL, 4CL and SPS in wild-type or *gsnor*-knockdown mutant cocultured with *P. morii*. The catalytic activity of tested enzymes was demonstrated by nkat (specific activity). Polyphenols were determined by the Folin-Ciocalteu method and expressed as gallic acid equivalents (GAE), using a standard curve generated with 0-80 mg/l gallic acid. Data points from mono- and coculture represent means  $\pm$  SD of three independent experiments with more than 15 samples measured at each sampling point. Asterisks indicate significant differences from the wild-type controls (*t* test,  $P < 0.01$ ).

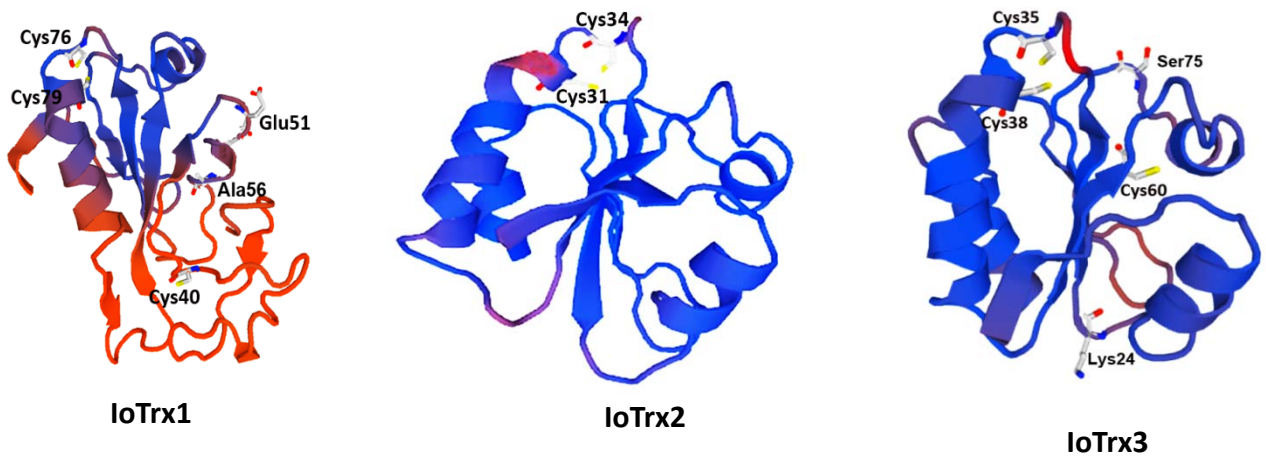

**Fig. S3** Predicted structures of IoTrx1, IoTrx2, IoTrx3 and GSNOR predicted by Swiss-model.

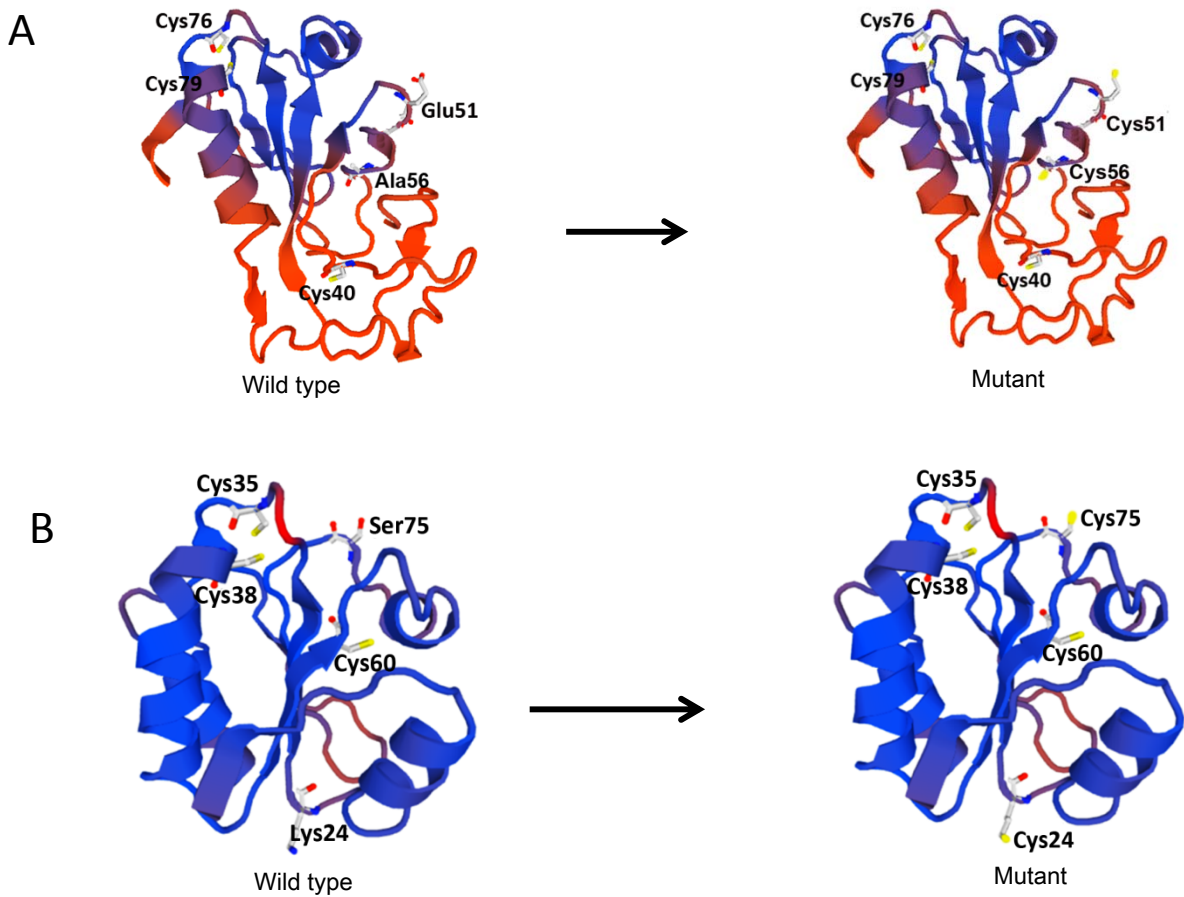

**Fig. S4** Strategies for replacement by cysteines in IoTrx1 and IoTrx3 according to the structures predicted 3D Swiss-modeling. **(A)** IoTrx1. **(B)** IoTrx3.

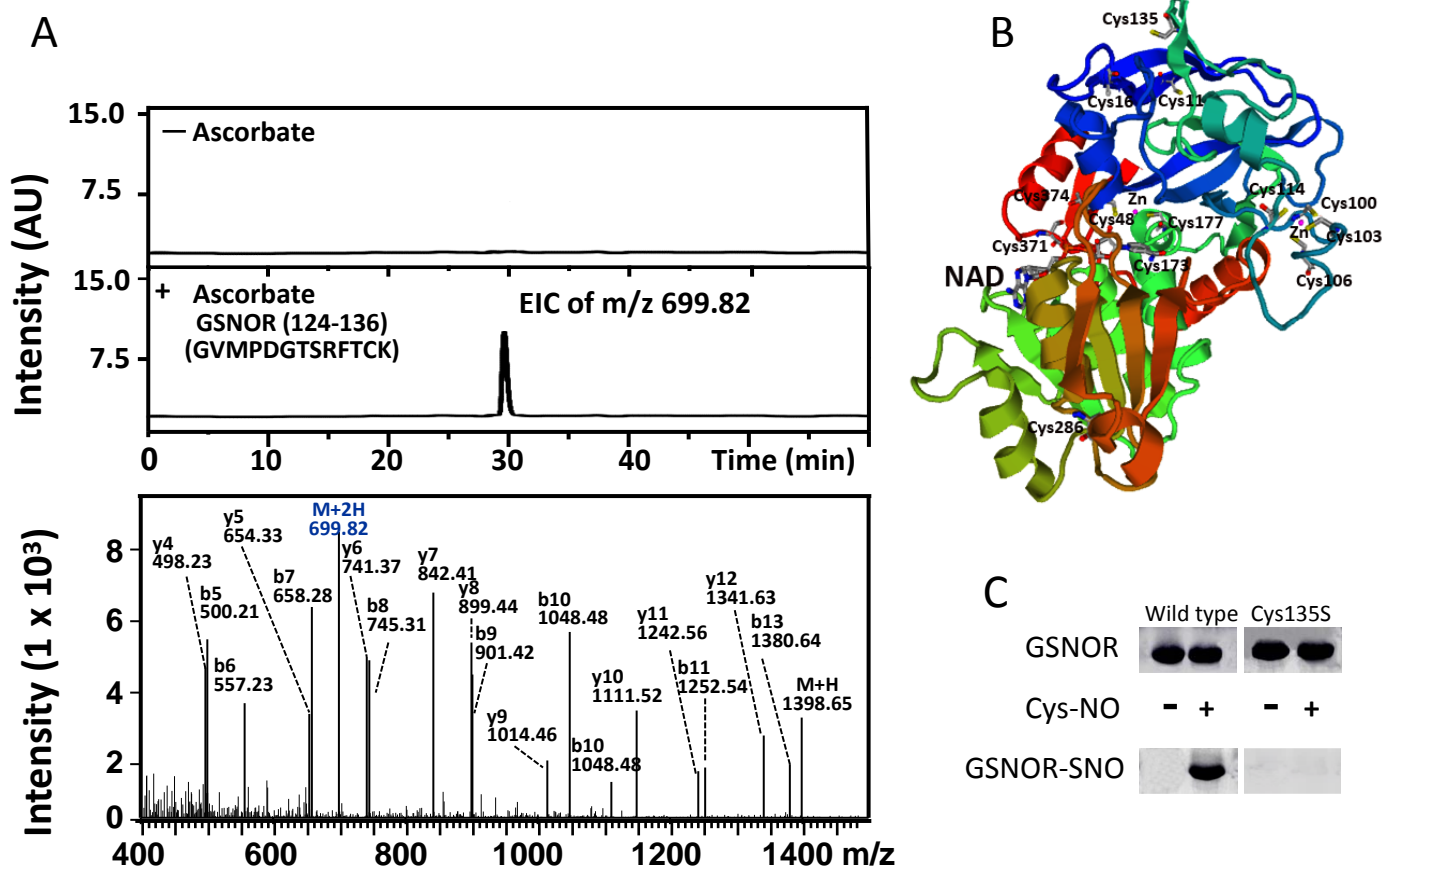

**Fig. S5** Analysis of SNO motif in GSNOR. **(A)** LC/MS/MS identification of the S-nitrosylation motif in GSNOR. A single chromatographic peak was detected in each of the EIC at m/z 699.82, which corresponds to the expected m/z values from double-charged SNO peptide GVMPDGTSRFTCK. **(B)** Predicted 3D structure of GSNOR by Swiss-Model. **(C)** S-nitrosylation of wild-type and Cys135Ser mutant GSNOR by Cys-NO. GSNOR was S-nitrosylated using 500  $\mu$ M of Cys-NO for 20 min in darkness. Excessive Cys-NO was removed by filtration using 3 kDa cutoff filters.

A

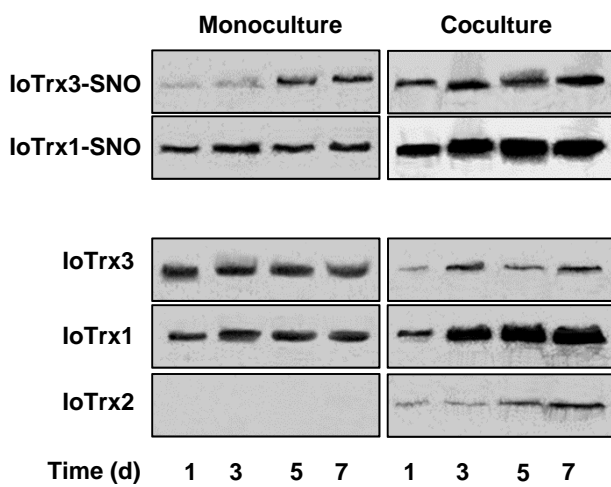

B

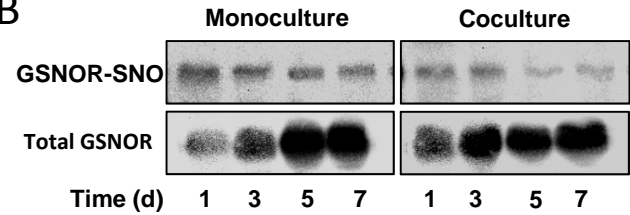

C

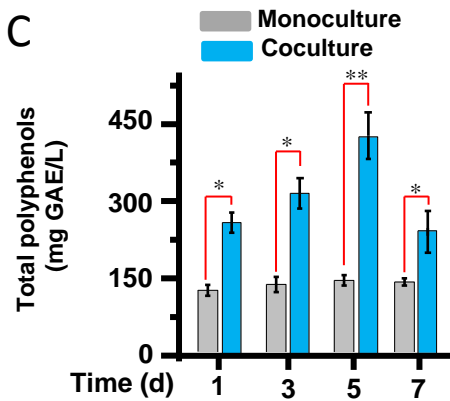

**Fig. S6** Dynamic expression and S-nitrosylation of Iotrxs and GSNOR in *Iotrx2* Knockdown mutant and their coordinating production of polyphenols in coculture of *I. obliquus* with *Phellinus morii*. **(A)** Expression and S-nitrosylation of the three Iotrxs. **(B)** Expression and the S-nitrosylation of GSNOR. **(C)** Production of polyphenols. Monoculture: a total of 20 ml *I. obliquus* mycelia homogenate was inoculated into 200 ml culture medium for submerged culture at 26°C; Coculture: a total of 2 ml homogenized *P. morii* was inoculated into the flasks containing 200 ml four-day-old overgrown mycelia of *I. obliquus*. Polyphenols were determined by the Folin-Ciocalteu method and expressed as gallic acid equivalents (GAE), using a standard curve generated with 0-80 mg/l gallic acid. Data points from mono- and coculture represent means  $\pm$  SD of three independent experiments with more than 15 samples measured at each sampling point. Asterisks indicate significant differences from the wild-type controls ( $t$  test,  $*P < 0.05$ ,  $**P < 0.01$ ).

Table S1 Oligonucleotides used in the study

| <b>Primer name</b> | <b>Oligonucleotide sequences</b>              | <b>Experiments</b>                          |
|--------------------|-----------------------------------------------|---------------------------------------------|
| RPAL-1F            | AGCCCATGGGTCGCTGGATCCTAAGACGTTTGAGATTGTTG     | Antibody prep                               |
| RPAL-1R            | TGGTGCTCGAGTGC GGCCGCTCACGCTATCCATTCTCC       |                                             |
| PAL_2 F            | AGCCCATGGGTCGCTGGATCCAGGAGATTGCGAAAGCGGTG     | Antibody prep                               |
| PAL_2 R            | TGGTGCTCGAGTGC GGCCGCTTTCCACCGTCCAGTCATTC     |                                             |
| 4-CL- F            | AGCCCATGGGTCGCTGGATCCGAATCAAGAAGGCGAAGTTC     | Antibody prep                               |
| 4-CL- R            | TGGTGCTCGAGTGC GGCCGCTGCACCCATGCAAAGAGATA     |                                             |
| sps-1 F            | AGCCCATGGGTCGCTGGATCCATGGTTGCTGCTCCAGGTT      | Antibody prep                               |
| sps-1R             | TGGTGCTCGAGTGC GGCCGCGAGTGGAACGGGGTA          |                                             |
| IoTrx1 F           | AGCCCATGGGTCGCTGGATCCGAATCCGTCAAGACGGGAAGC    | Antibody prep                               |
| IoTrx1 R           | TGGTGCTCGAGTGC GGCCGCTTAGACTCGGTGGCCATCTTGCGT |                                             |
| IoTrx2 F           | AGCCCATGGGTCGCTGGATCCCAGGGCGATGCCTACGTTG      | Antibody prep                               |
| IoTrx2 R           | TGGTGCTCGAGTGC GGCCGCTTATTGGTGCCGTAACCTCACAC  |                                             |
| IoTrx3 F           | AGCCCATGGGTCGCTGGATCCAACCGCAATTTGTGCGGGGTG    | Antibody prep                               |
| IoTrx3 R           | TGGTGCTCGAGTGC GGCCGCTTACACCCAATCTCCTCCCGT    |                                             |
| IoTrx1F-1          | CCATCGATTGGACCATGCAAGATGATG                   | Gene knockdown                              |
| lotrx1R-1          | CCCAAGCTTTTATCCTTTTGCATCGCACC                 |                                             |
| IoTrx1 F-2         | CGCGGATCCTGGACCATGCAAGATGATG                  | Gene knockdown                              |
| IoTrx1 R-2         | TCCCCGGGTTATCCTTTTGCATCGCACC                  |                                             |
| IoTrx2 F-1         | CCATCGATTATGACGGTCACCGTAGTCAAG                | Gene knockdown                              |
| lotrx2 R-1         | CCCAAGCTTTACACCCAATCTCCTCCCGT                 |                                             |
| IoTrx2 F-2         | CGCGGATCCTATGACGGTCACCGTAGTCAAG               | Gene knockdown                              |
| IoTrx2 R-2         | TCCCCGGGTTTACACCCAATCTCCTCCCGT                |                                             |
| IoTrx3 F-1         | CCATCGATTATGGCCAATAACTTAAACGAAATATCC          | Gene knockdown                              |
| lotrx3 R-1         | CCCAAGCTTCAGGTTGATAATTCCACCCG                 |                                             |
| IoTrx3 F-2         | CGCGGATCCTATGGCCAATAACTTAAACGAAATATCC         | Gene knockdown                              |
| IoTrx3 R-2         | TCCCCGGGTTTACAGGTTGATAATTCCACCCG              |                                             |
| GSNOR F-1          | CCATCGATAAGTGCAAGGCTGCAGTATG                  | Gene knockdown                              |
| GSNOR R-1          | CCCAAGCTTCCCTTCCCGCATAAGTTTCGTC               |                                             |
| GSNOR F-2          | CGCGGATCC AAGTGCAAGGCTGCAGTATG                | Gene knockdown                              |
| GSNOR R-2          | TCCCCGGG CCTTCCCGCATAAGTTTCGTC                |                                             |
| pm4CLC399S F       | TACATTCTATCACGTCCGGGGCGGCTCCTCTTGTTTCGGA      | Point-mutation and SNO motif identification |
| pm4CLC399S R       | GAGGAGCCGCCCCGACGTGATAGAATGTAAGGAGCTGAA       |                                             |
| pmSPSC142S F       | ATTCCAAGAACGCATCTTACGGCTCGACAGCTGCATTGTT      | Point-mutation and SNO motif identification |
| pmSPSC142S R       | GCTGTGAGCCGTAAGATGCGTTCTTGAATCGATTTCCTT       |                                             |
| pmPAL1 F           | TAGAGCAAGCAGCTTCCCTTAGGGACTTTATCACTTCCTT      | Point-mutation and SNO motif identification |
| pmPAL1 R           | TGATAAAGTCCCTAAGGGAAGCTGCTTGCTCTAGATTCGC      |                                             |
| pmPAL2 F           | CTACTAGCCCAGGCAGCCTGCCTCAAGGACTTCATTGCTT      | Point-mutation and SNO motif identification |
| pmPAL2 R           | AATGAAGTCCTTGAGGCAGGCTGCCTGGGCTAGTAGAGCA      |                                             |
| pmIoTrxL1-76p1     | TGTTGTGAGTTGGTCTGGGCCATGTAAGATGCTAAGCCC       | Point-mutation and trapping experiment      |
| pmIoTrxL1-76p2     | ATCTTACATGGCCCAGACCAACTGCACAACATCAACAACG      |                                             |
| pmIoTrxL1-79p1     | GTTGGTGTGGGCCATCTAAGATGCTAAGCCCAATCCTTGC      | Point-mutation and trapping experiment      |
| pmIoTrxL1-79p2     | GGGCTTAGCATCTTAGATGGCCCACACCAACTGCACAACA      |                                             |

Table S1 continued...

| Primer name     | Oligonucleotide sequences                                      | Experiments                            |
|-----------------|----------------------------------------------------------------|----------------------------------------|
| pmloTrxL3-38 p1 | CTTGGTGTGGACCATCCAAGATGATGGCTCCTACATTGCG                       | Point-mutation and trapping experiment |
| pmloTrxL3-38 p2 | GGAGCCATCATCTTGgATGGTCCACACCAAGTGGCGTAGA                       |                                        |
| pmloTrxL3-35p1  | CTACGCCACTTGGTCTGGACCATcCAAGATGATGGCTCCT                       | Point-mutation and trapping experiment |
| pmloTrxL3-35p2  | ATCTTGgATGGTCCAGACCAAGTGGCGTAGAAGTCAATGA                       |                                        |
| pmloTrxL2-34p1  | GTGGTGTGGTCCATCCCGCGTGATTCGCCAATCTTTGAG                        | Point-mutation and trapping experiment |
| pmloTrxL2-34p2  | GCGAAATCACGCGGGATGGACCACACCACGTCGCCAGAA                        |                                        |
| pmloTrxL2-31p1  | TCTGGGCGACGTGGTCTGGTCCATCCCGCGTGATTCGCC                        | Point-mutation and trapping experiment |
| pmloTrxL2-31p2  | ACGCGGGATGGACCAGACCACGTCGCCAGAAAGTCGAATA                       |                                        |
| PAL-1F          | CCGCTGGTTCGCGTGGATCCATGGTTGCAAAGTCAGACGGTC                     | S-nitrosylation                        |
| PAL-1R          | CTCGAGTGCGGCCGCAAGCTTTCTTCACGCTATCCATTCTCC                     |                                        |
| PAL_2 F         | CCGCTGGTTCGCGTGGATCCATGGTAGTCAACTCAGACGGC                      | S-nitrosylation                        |
| PAL_2 R         | CTCGAGTGCGGCCGCAAGCTTTTCCACCGTCCAGTCATTC                       |                                        |
| 4-CL- F         | CCGCTGGTTCGCGTGGATCCATGGCCGTGGGACTGGTCCAAC                     | S-nitrosylation                        |
| 4-CL- R         | CTCGAGTGCGGCCGCAAGCTTGTGACCCATGCAAAGAGATA                      |                                        |
| sps-1 F         | CCGCTGGTTCGCGTCGTGGATCCATGGTTGCTGCTCCAGGTT                     | S-nitrosylation                        |
| sps-1R          | CTCGAGTGCGGCCGCAAGCTTGGAGAGTGGAACGGGGTA                        |                                        |
| loTrxR- F       | CCGCTGGTTCGCGTGGATCCATGGCACCGATCAATGGTACGG                     | denitrosylation assay                  |
| loTrxR-R        | CTCGAGTGCGGCCGCAAGCTTGTGAGTGGGGTGTGAGAGAG                      |                                        |
| loTrx-L1 F      | CCGCTGGTTCGCGTGGATCCATGACGGTCACCGTAGTCAAGA                     | denitrosylation assay                  |
| loTrx- L1 R     | CTCGAGTGCGGCCGCAAGCTTAGACTCGGTGGCCATCTTGCGT                    |                                        |
| loTrx-L2 F      | CCGCTGGTTCGCGTGGATCCATGGCCAATAACTTAAACGAAAT                    | denitrosylation assay                  |
| loTrx-L2 R      | CTCGAGTGCGGCCGCAAGCTTATTGGTGCCGTAACTCACAC                      |                                        |
| loTrx-L3 F      | CCGCTGGTTCGCGTGGATCCATGACGGTCACCGTAGTCAAG                      | denitrosylation assay                  |
| loTrx-L3 R      | CTCGAGTGCGGCCGCAAGCTTTACACCCAATCTCCTCCCGT                      |                                        |
| GSNOR F         | CCG CTG GTT CCG CGTGGATCCATGTCAGAAACTGCAG GA<br>AAAATCATCAAGTG | Cloning and expression                 |
| GSNOR R         | CTCGAGTGCGGCCGCAAGCTTTTAGAGTTCGCTCATATCAACAAC<br>GCAACG        |                                        |
| pmGSNOR 1       | ATGGTACATCTCGTTACGTCCAAGGGC                                    | Site-directed mutagenesis of GSNOR     |
| pmGSNOR2        | GTGTAGGGACTGGCCCTTGACGTGAACC                                   |                                        |
| baitloTrxL1F    | CATGGAGGCCGAATTCATGTCAGGCCTTCGTTTCGTACC                        | yeast two hybrid assay                 |
| baitloTrxL1R    | GCAGGTGACGGATCCTCATAGCCAATTCATTTCTCTGCCAACG                    |                                        |
| baitloTrxL3 F   | CATGGAGGCCGAATTCATGGCCAATAACTTAAACGAAATATC                     | yeast two hybrid assay                 |
| baitloTrxL3R    | GCAGGTGACGGATCCATTGGTGCCGTAACTCACAC                            |                                        |
| preyGSNOR F     | TGGCCATTATGGCCCGGGATGTCAGAAACTGCAGGAAAAATCA                    | yeast two hybrid assay                 |
| preyGSNOR R     | GACATGTTTTTCCCGGGTTAGAGTTCGCTCATATCAACA                        |                                        |
